# Supplementary material for: Breast adipocyte size associates with ipsilateral invasive breast cancer risk after ductal carcinoma in situ
Source: PubMed Central journal article supplement (PMC7985299; doi:10.1038/s41523-021-00232-w), 2021-03-22
Supplement: 41523_2021_232_MOESM1_ESM.pdf [file 41523_2021_232_MOESM1_ESM.pdf]

## Supplementary tables and figures

**Supplementary table 1** Source and dilutions of primary antibodies

| Antigen | Clone | Dilution     | Manufacturer |
|---------|-------|--------------|--------------|
| ER      | SP1   | Ready-to-use | Ventana      |
| PR      | 1E2   | Ready-to-use | Ventana      |
| Her2    | 4B5   | Ready-to-use | Ventana      |
| COX-2   | CX294 | 1/100        | DAKO         |
| CD68    | KP1   | 1/10000      | DAKO         |

**Supplementary Table 2** Univariate results of number of CLS per 10 cm<sup>2</sup> with subsequent iIBC

| Characteristics            | Range | DCIS cases<br>(n=108)<br>(%) | DCIS controls<br>(n=168)<br>(%) | OR (95% CI) <sup>1</sup>       | <i>p</i> <sup>2</sup> |
|----------------------------|-------|------------------------------|---------------------------------|--------------------------------|-----------------------|
| CLS/10 cm <sup>2</sup> *   | 0-211 |                              |                                 | 1.24 (0.80-1.93)<br>per 10 CLS | .16                   |
| CLS/10 cm <sup>2</sup> *   |       |                              |                                 |                                | .220                  |
| < 5 CLS/10 cm <sup>2</sup> | 0-5   | 16 (14.8)                    | 20 (11.9)                       | 1.00 (reference)               |                       |
| ≥ 5 CLS/10 cm <sup>2</sup> | 5-211 | 10 (9.3)                     | 10 (6.0)                        | 1.20 (0.43-3.35)               |                       |
| N/A                        |       | 82 (75.9)                    | 138 (82.1)                      |                                |                       |

<sup>1</sup>: DCIS cases and DCIS controls were compared by univariate conditional logistic regression.

<sup>2</sup>: *p*-values are likelihood ratio based.

\*: CLS were assessable in a 26 matched case-control sets consisting of 26 cases and 30 controls.

N/A: an insufficient number of paraffin blocks resulted in many incomplete case-control sets available for conditional logistic regression. N/As were not included in the analysis.

**Supplementary Table 3** Multivariate results of adipocyte characteristics with subsequent iIBC

| Characteristics                                               | DCIS cases<br>(n=108)<br>(%) | DCIS controls<br>(n=168)<br>(%) | OR (95% CI) <sup>1</sup> | p <sup>2</sup> |
|---------------------------------------------------------------|------------------------------|---------------------------------|--------------------------|----------------|
| Adipocyte area <sup>75th</sup> /periductal fibrosis/<br>COX-2 |                              |                                 |                          | <.001          |
| Adipocyte area <sup>75th</sup>                                |                              |                                 |                          |                |
| Quartile 1-3                                                  | 74 (68.5)                    | 133 (79.2)                      | 1.00 (reference)         |                |
| Quartile 4                                                    | 34 (31.5)                    | 35 (20.8)                       | 2.20 (1.15-4.21)         |                |
| COX-2                                                         |                              |                                 |                          |                |
| Low                                                           | 10 (9.3)                     | 36 (21.4)                       | 1.00 (reference)         |                |
| High                                                          | 96 (88.9)                    | 128 (76.2)                      | 4.29 (1.77-10.4)         |                |
| N/A                                                           | 2 (1.9)                      | 4 (2.4)                         |                          |                |
| Periductal fibrosis                                           |                              |                                 |                          |                |
| Absent                                                        | 70 (64.8)                    | 125 (74.4)                      | 1.00 (reference)         |                |
| Present                                                       | 38 (35.2)                    | 43 (25.6)                       | 1.54 (0.86-2.76)         |                |
| Adipocyte area <sup>75th</sup> /Her2/<br>COX-2                |                              |                                 |                          | <.001          |
| Adipocyte area <sup>75th</sup>                                |                              |                                 |                          |                |
| Quartile 1-3                                                  | 74 (68.5)                    | 133 (79.2)                      | 1.00 (reference)         |                |
| Quartile 4                                                    | 34 (31.5)                    | 35 (20.8)                       | 2.48 (1.27-4.83)         |                |
| COX-2                                                         |                              |                                 |                          |                |
| Low                                                           | 10 (9.3)                     | 36 (21.4)                       | 1.00 (reference)         |                |
| High                                                          | 96 (88.9)                    | 128 (76.2)                      | 4.10 (1.70-9.87)         |                |
| N/A                                                           | 2 (1.9)                      | 4 (2.4)                         |                          |                |
| Her2                                                          |                              |                                 |                          |                |
| Negative                                                      | 69 (63.9)                    | 123 (73.2)                      | 1.00 (reference)         |                |
| Positive                                                      | 37 (34.3)                    | 43 (25.6)                       | 1.37 (0.75-2.50)         |                |
| N/A                                                           | 2 (1.9)                      | 2 (1.2)                         |                          |                |

<sup>1</sup>: DCIS cases and DCIS controls were compared by multivariate conditional logistic regression.

<sup>2</sup>: p-values are likelihood ratio based.

Adipocyte area<sup>75th</sup>, COX-2, periductal fibrosis and Her2 were included in multivariate analyses.

N/A: Not assessable; N/As were not included in the analysis.

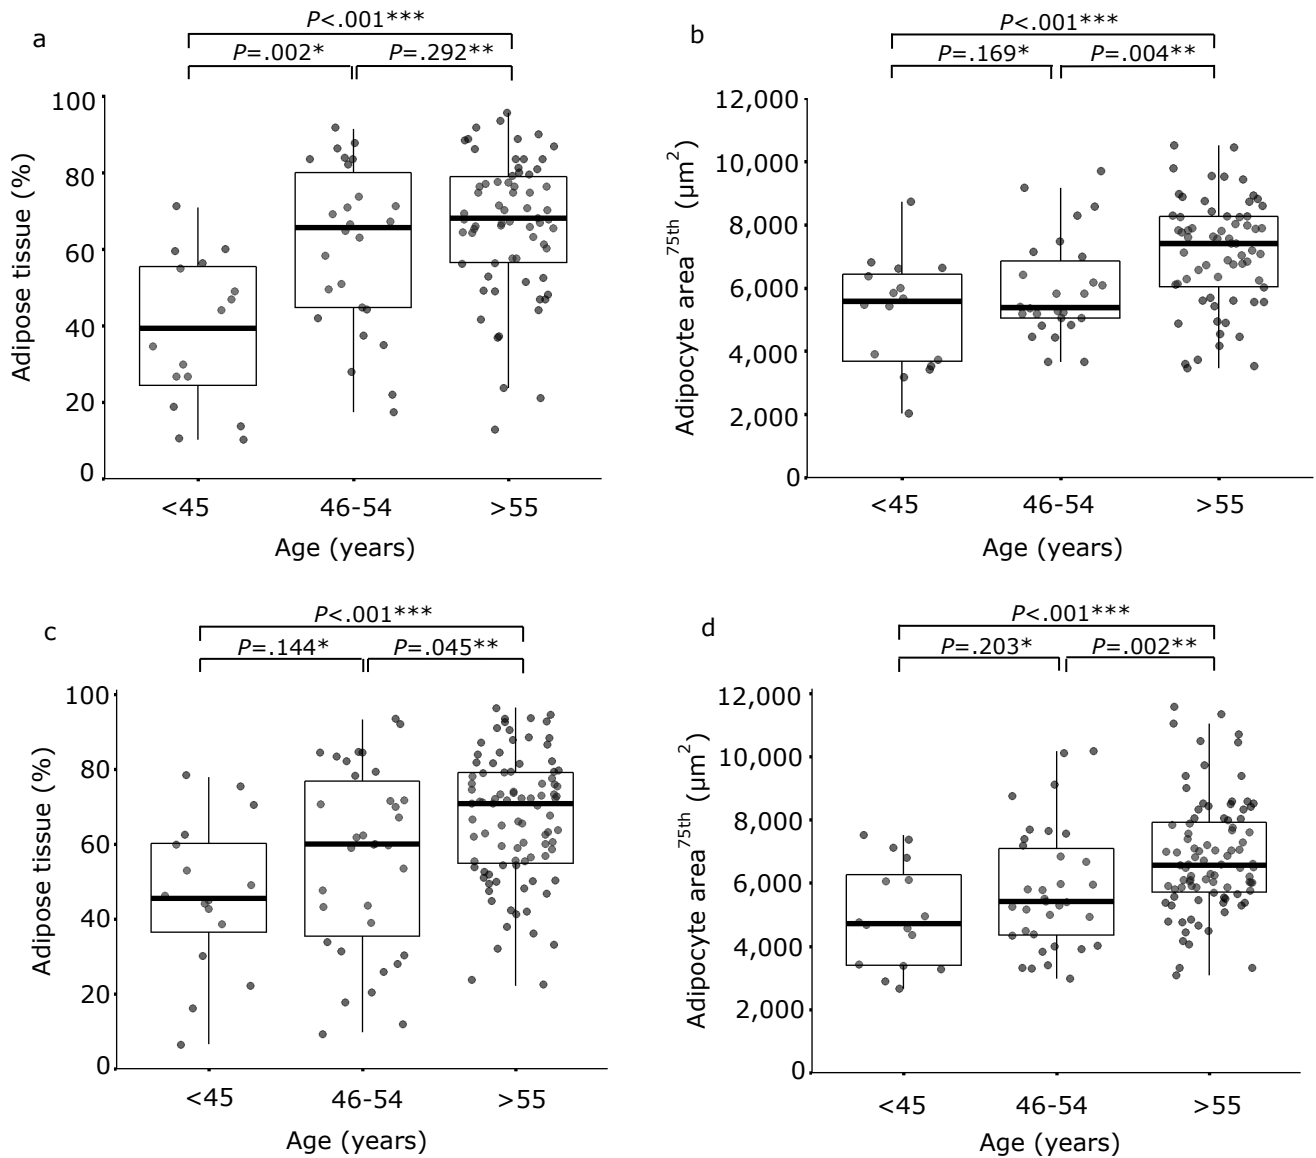

**Supplementary figure 1** Older DCIS cases and controls have a higher percentage of breast adipose tissue and larger adipocyte size

a. A higher percentage of mammary adipose tissue is significantly associated with older age in DCIS cases (n=108) that developed subsequent iIBC.

\*)  $P=.002$ , \*\*)  $P=.292$ , \*\*\*)  $P<.001$  (Mann-Whitney  $U$  Test), overall  $P<.001$  (Kruskal-Wallis test).

b. Larger mammary adipocyte size is significantly associated with older age in cases (n=108).

\*)  $P=.169$ , \*\*)  $P<.004$ , \*\*\*)  $P<.001$  (Student's T-test), overall  $P<.001$  (one-way ANOVA).

c. A higher percentage of mammary adipose tissue is significantly associated with older age in DCIS controls (n=168).

\*)  $P=.144$ , \*\*)  $P=.045$ , \*\*\*)  $P<.001$  (Mann-Whitney  $U$  Test), overall  $P<.001$  (Kruskal-Wallis test).

d. Larger mammary adipocyte size is also significantly associated with older age in controls ( $n=168$ ).

\*)  $P=.203$ , \*\*)  $P<.002$ , \*\*\*)  $P<.001$  (Mann-Whitney  $U$  Test), overall  $P<.001$  (Kruskal-Wallis test).

The central line in boxes represent the median value, boundaries of boxes represent the interquartile range (IQR), and ends of whiskers represent values at  $1.5 \times$  IQR.

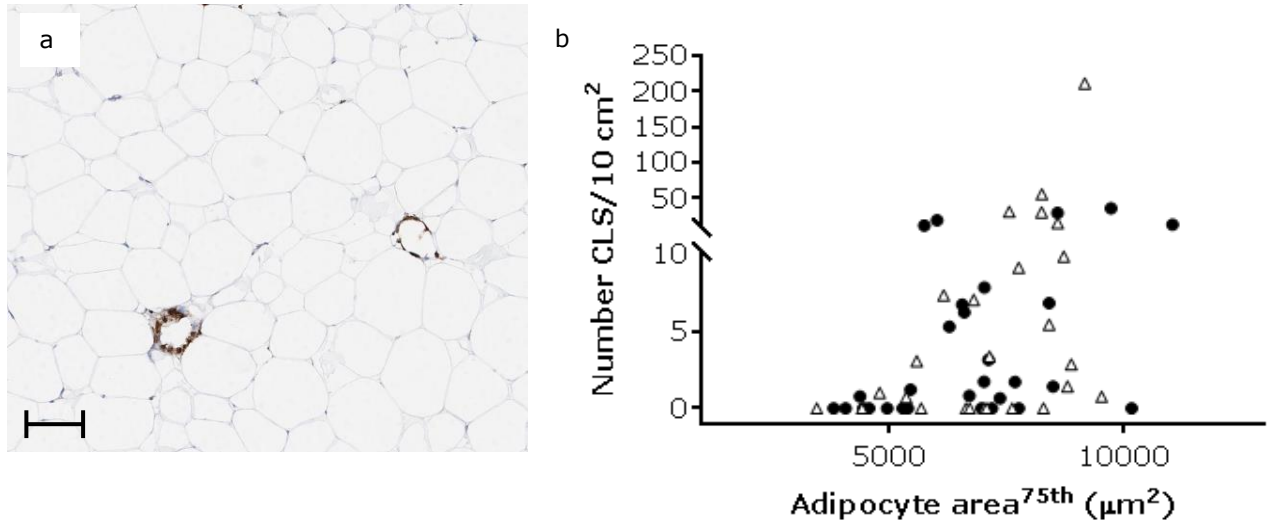

**Supplementary Figure 2** Number of CLS per 10 cm<sup>2</sup> adipose tissue in relation to mammary adipocyte area<sup>75th</sup>

a. High magnification of CD68 staining on mammary adipocytes with two crown-like structures. The scale bar represents 100 μm.

b. Spearman correlation coefficient was used to evaluate the relation between CLS and mammary adipocyte area<sup>75th</sup> in DCIS cases (triangles) and controls (black dots). The number of CLS is associated with larger adipocyte area<sup>75th</sup> ( $\rho = .47$ , 95% CI 0.23-0.66,  $P < .001$ ).
